# Supplementary material
Source: publisher figshare collection journal article supplement (https://acs.figshare.com/ndownloader/files/3915157)
Supplement: Supplementary file 1 [file 3915157]

# Supporting Information

## Screening of DNA Aptamers against Myoglobin Using Positive and Negative Selection Units Integrated Microfluidic Chip and its Biosensing Application

Qing Wang, Wei Liu<sup>†</sup>, Yuqian Xing<sup>†</sup>, Xiaohai Yang<sup>\*</sup>, Kemin Wang<sup>\*</sup>, Rui Jiang, Pei Wang and Qing Zhao

*State Key Laboratory of Chemo/Biosensing and Chemometrics, College of Chemistry and Chemical Engineering, Key Laboratory for Bio-Nanotechnology and Molecular Engineering, Hunan University, Changsha, 410082, China*

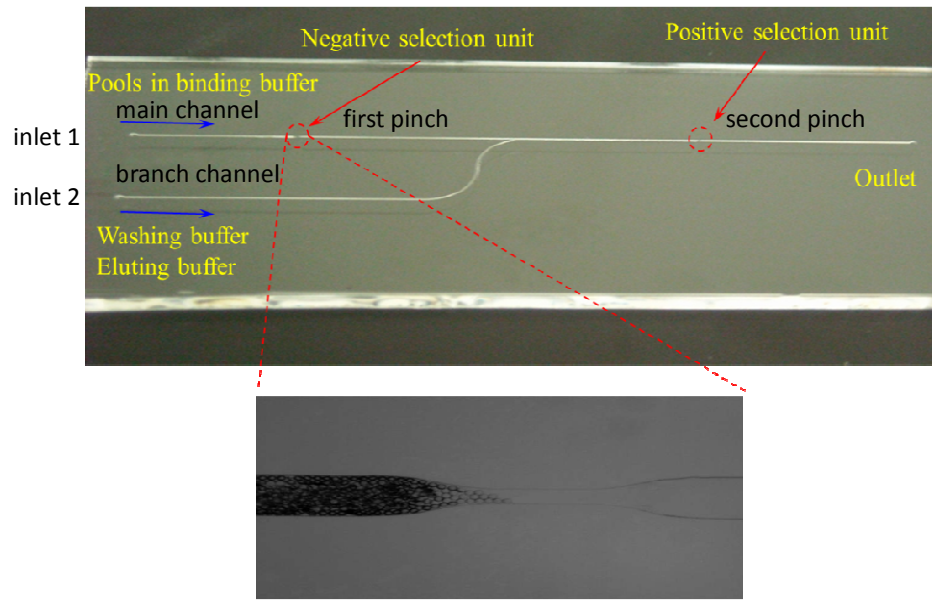

**Figure S1.** Structure of microfluidic device

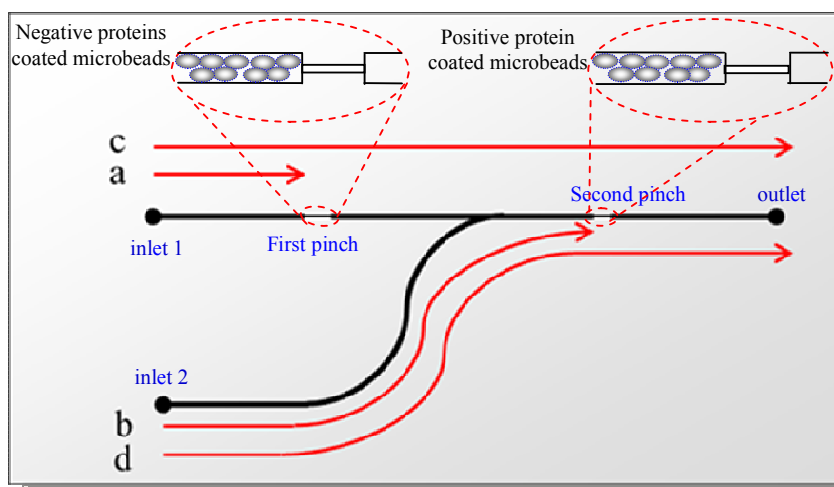

**Figure S2.** Sample injecting strategy. (a) Introduce the negative proteins-coated microbeads before the first pinch; (b) introduce the positive protein-coated microbeads before the second pinch; (c) inject the library in binding buffer; (d) inject washing buffer and eluting buffer in turn.

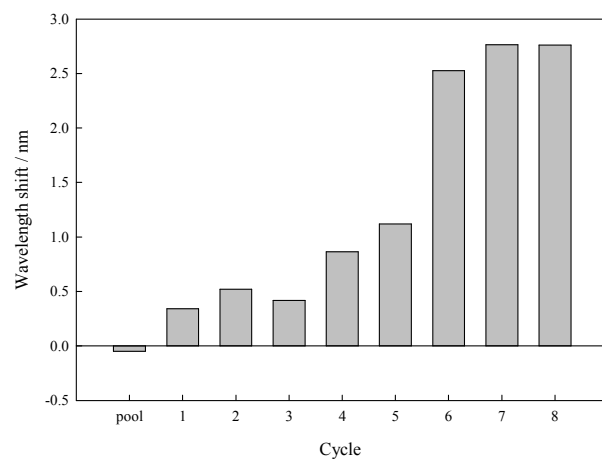

**Figure S3.** Efficiency of each round of selection. Original pool was used as control.

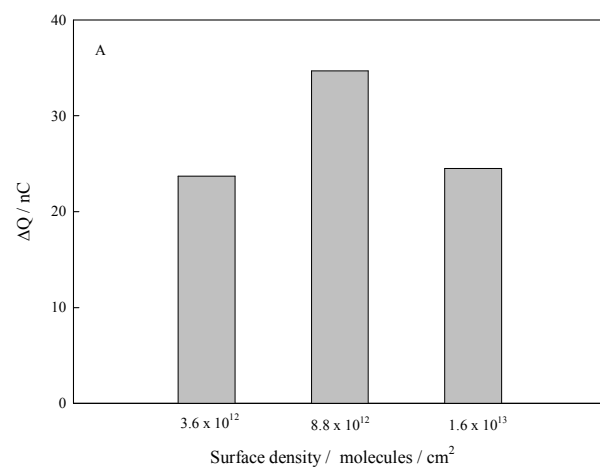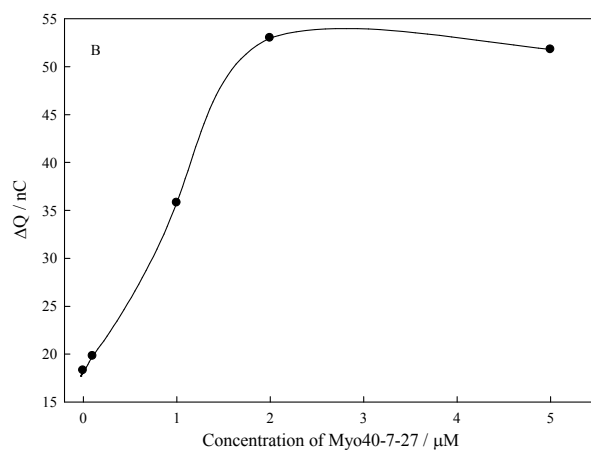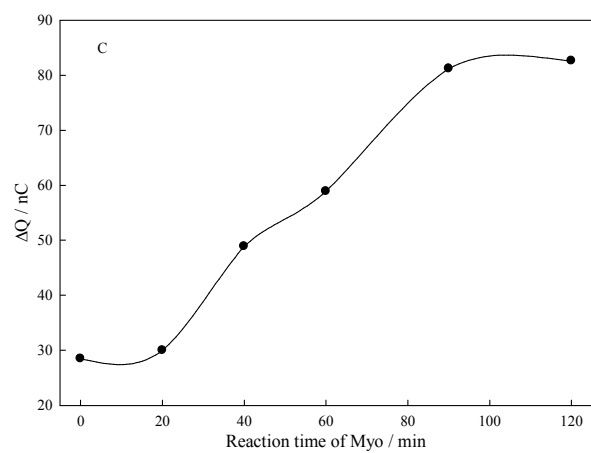

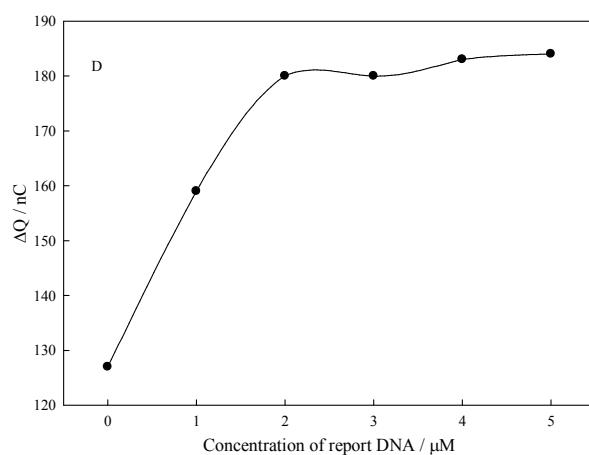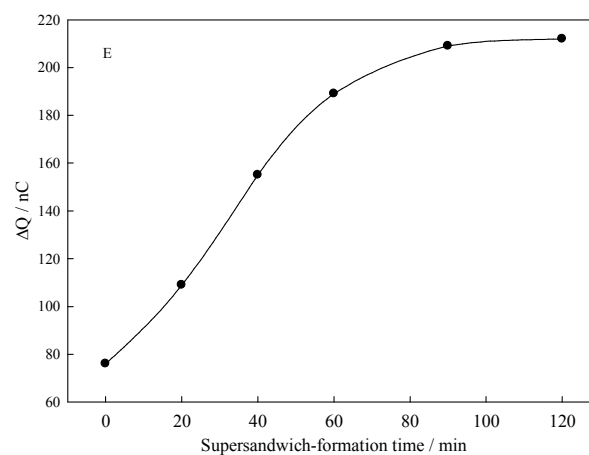

**Figure S4.** The effect of different factors on the detection of Myo.

(A) The effort of different surface density of capture DNA. Concentration of Myo: 10 nM; Concentration of Myo40-7-27: 5  $\mu\text{M}$ ; Reaction time of Myo on the electrodes: 60 min.

(B) The effort of different Myo40-7-27 concentration. Surface density:  $8.8 \times 10^{12}$  molecule/ $\text{cm}^2$ ; Concentration of Myo: 10 nM; Reaction time of Myo on the electrodes: 60 min.

(C) The effort of different reaction time of Myo. Surface density:  $8.8 \times 10^{12}$

molecule/cm<sup>2</sup>; Concentration of Myo: 10 nM; Concentration of Myo40-7-27: 2 μM.

(D) The effort of different report DNA concentration. Here, the concentration of report DNA1 equal to that of report DNA2. Surface density:  $8.8 \times 10^{12}$  molecule/cm<sup>2</sup>; Concentration of Myo: 10 nM; Concentration of Myo40-7-27: 2 μM; Reaction time of Myo on the electrodes: 90 min; Supersandwich-formation time: 90 min.

(E) The effort of different supersandwich-formation time. Surface density:  $8.8 \times 10^{12}$  molecule/cm<sup>2</sup>; Concentration of Myo: 10 nM; Concentration of Myo40-7-27: 2 μM; Concentration of report DNA: 2 μM. Reaction time of Myo on the electrodes: 90 min.

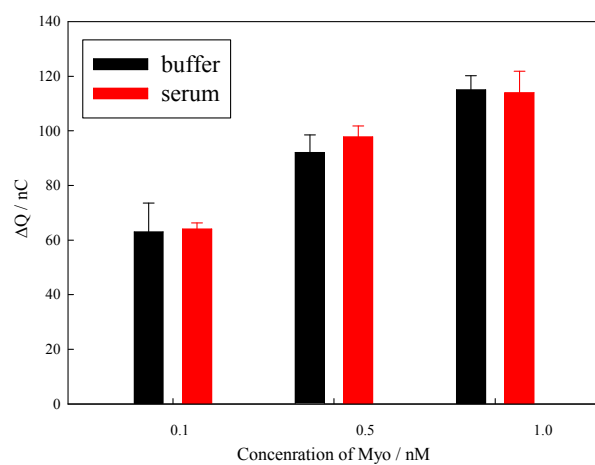

**Figure S5.** Detection of Myo in Human serum and buffer. The error bars represent the standard deviation of three measurements.
